# Supplementary material
Source: MDPI journal article supplement (https://www.mdpi.com/2073-4468/13/2/42)
Supplement: s1 [file s1]

## Supplementary materials

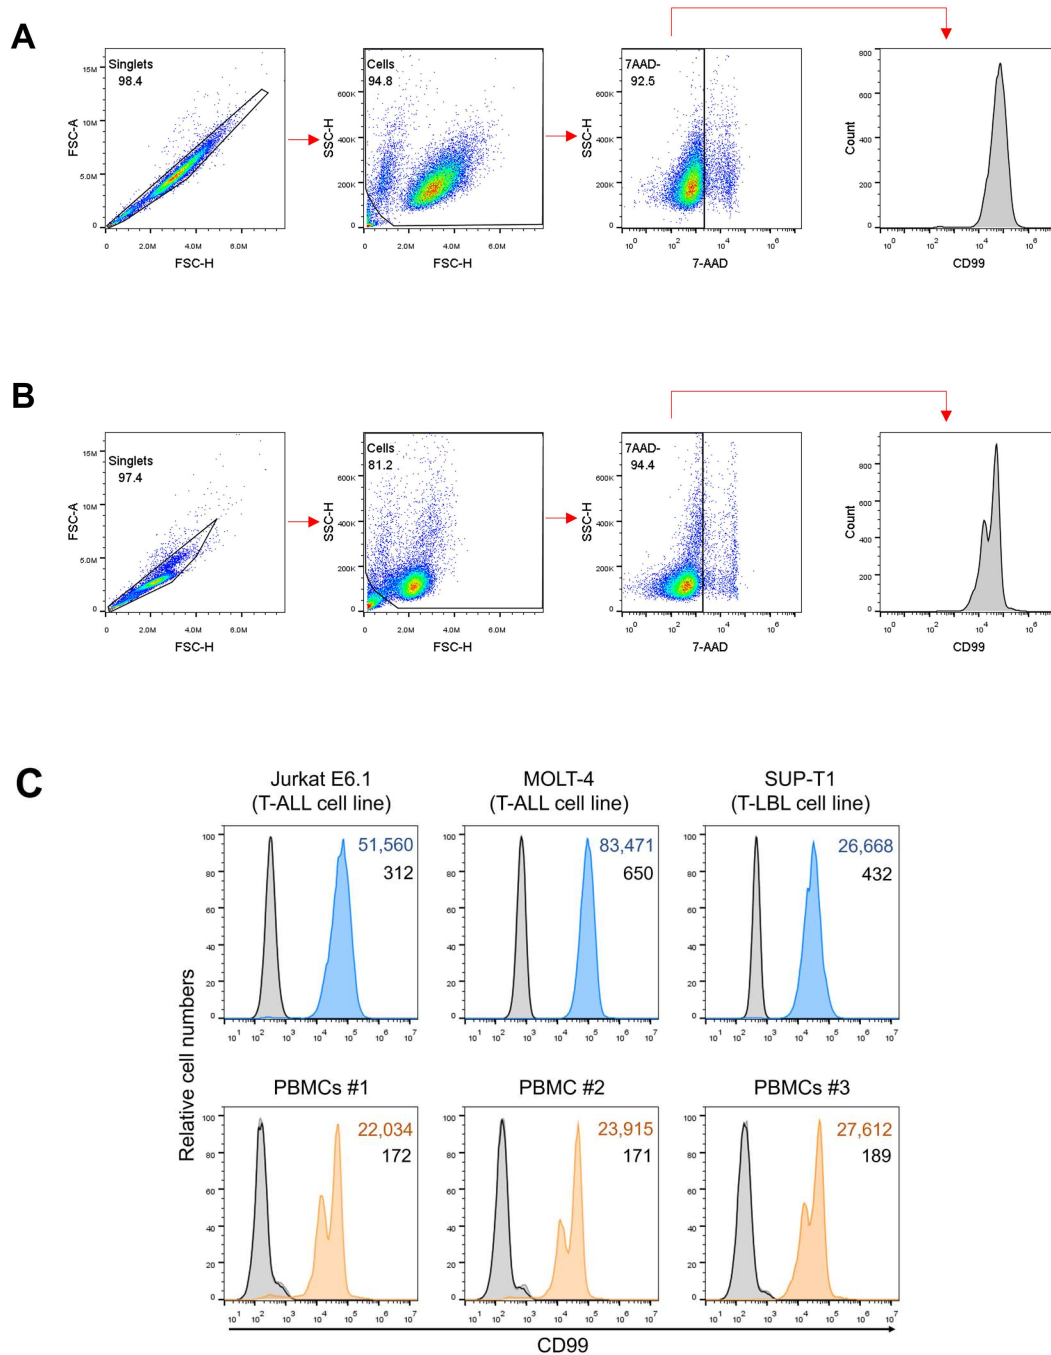

**Supplementary Figure S1.** Immunofluorescence staining of T cell lines and human PBMCs with mAb MT99/3. T cell lines and human PBMCs ( $n=3$ ) were incubated with 20  $\mu\text{g/mL}$  of mAb MT99/3 (mouse IgG2a) or isotype matched control mAb 4G2 or without antibody for 30 minutes after Fc receptor blocking. Bound antibodies were detected using Alexa Flour-488-anti-mouse IgG Abs (H + L chains specific). After that, the stained cells were suspended in 7-AAD solution and analyzed by flow cytometry. Gating strategies for flow cytometric analysis. The first gating of T cell lines (A) and

PBMCs (B) was the gating of singlet cells in plot between FSC-H and FSC-A. Singlet cells were gated to plot between FSC-H and SSC-H. The cells from the gate of FSC-H and SSC-H were analyzed for 7-AAD-. The lived cells (7-AAD-) were gated to analyze the reactivity of mAb MT99/3 using histogram graph. (C) The histograms exhibit the staining of mAb MT99/3 (blue or orange peaks), isotype-matched control mAb 4G2 (clear peaks), or without mAbs (gray peaks). Geometric mean fluorescence intensity of CD99 expression (colored) and isotype-matched control mAb staining (black) is indicated at the upper right corner of the histogram graph.

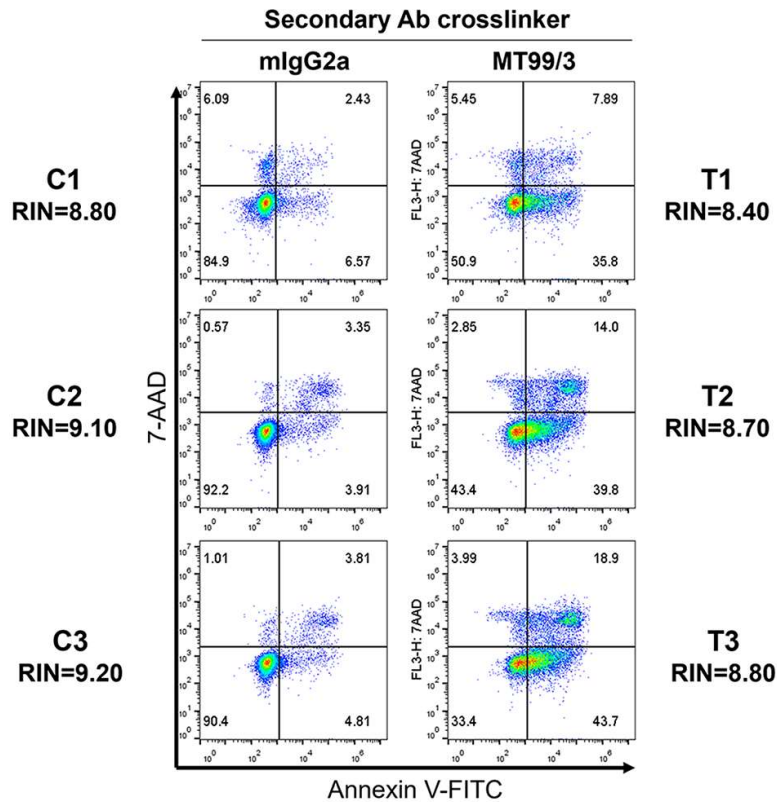

**Supplementary Figure S2.** Antibody-treated Jurkat E6.1 cells for RNA extraction. Jurkat E6.1 cells were treated with mAb MT99/3 or mIgG2a (isotype-matched control mAb 4G2) in the presence of secondary antibody crosslinker for 90 minutes. Flow cytometric analysis of apoptotic cells was performed using Annexin-V-FITC and 7-AAD before RNA extraction. Three independent experiments were carried out and indicated as T1, T2 and T3 for mAb MT99/3 treatment and C1, C2 and C3 for isotype-matched control mAb treatment. RNA Integrity Number (RIN) after extraction analyzed by Agilent 2100 Bioanalyzer are shown.

**Supplementary Table S1. Filtered data quality**

| <b>Sample</b> | <b>Length<br/>(bp)</b> | <b>Reads</b> | <b>Bases</b>  | <b>Q20 (%)</b> | <b>Q30 (%)</b> | <b>GC (%)</b> |
|---------------|------------------------|--------------|---------------|----------------|----------------|---------------|
| C1            | 143.52                 | 55,986,084   | 8,034,966,837 | 97.54          | 93.24          | 48.43         |
| C2            | 142.79                 | 46,609,370   | 6,655,449,531 | 97.86          | 93.96          | 48.67         |
| C3            | 143.45                 | 47,439,424   | 6,805,317,090 | 97.49          | 93.14          | 48.18         |
| T1            | 144.05                 | 52,879,358   | 7,617,517,816 | 97.65          | 93.52          | 48.64         |
| T2            | 143.10                 | 53,325,982   | 7,631,041,468 | 97.58          | 93.37          | 48.56         |
| T3            | 143.43                 | 50,534,894   | 7,248,391,288 | 97.42          | 92.97          | 48.36         |

**Supplementary Table S2. Differentially expressed genes of the most significant top 30 pathways in KEGG enrichment**

| Pathway term                                                  | genes belong to each pathway                               |                     |
|---------------------------------------------------------------|------------------------------------------------------------|---------------------|
|                                                               | Upregulated genes                                          | Downregulated genes |
| Viral protein interaction with cytokine and cytokine receptor | CXCR3, TNF                                                 | /                   |
| Type II diabetes mellitus                                     | SOCS1, TNF, MAFA                                           | /                   |
| TNF signaling pathway                                         | JUNB, FOS, TNF                                             | /                   |
| Th1 and Th2 cell differentiation                              | NFATC1, FOS, TBX21, MAF                                    | /                   |
| Th17 cell differentiation                                     | NFATC1, IL27RA, FOS, TBX21                                 | /                   |
| T cell receptor signaling pathway                             | NFATC1, ICOS, PTPN6, FOS, TNF, PDCD1                       | /                   |
| Prolactin signaling pathway                                   | SOCS1, FOS                                                 | /                   |
| Pertussis                                                     | FOS, TNF                                                   | /                   |
| PD-L1 expression and PD-1 checkpoint pathway in cancer        | NFATC1, PTPN6, FOS, PDCD1                                  | /                   |
| Osteoclast differentiation                                    | NFATC1, JUNB, SOCS1, FOS, TNF, FOSL1                       | /                   |
| Natural killer cell mediated cytotoxicity                     | NFATC1, PTPN6, TNF, FASLG                                  | /                   |
| MicroRNAs in cancer                                           | SPRY2, SOCS1, PDGFA                                        | /                   |
| Maturity onset diabetes of the young                          | MAFA, FOXA2                                                | /                   |
| koK signaling pathway                                         | DUSP2, NR4A1, DUSP5, NFATC1, PDGFA, FOS, TNF, FASLG, DUSP6 | /                   |
| JAK-STAT signaling pathway                                    | SOCS1, IL27RA, PTPN6, PDGFA                                | /                   |
| Inflammatory bowel disease                                    | NFATC1, TNF, TBX21, MAF                                    | /                   |

**Supplementary Table S2. Differentially expressed genes of the most significant top 30 pathways in KEGG enrichment (cont.)**

| Pathway term                                         | Symbols of genes belong to each pathway    |                     |
|------------------------------------------------------|--------------------------------------------|---------------------|
|                                                      | Upregulated genes                          | Downregulated genes |
| IL-17 signaling pathway                              | FOS, TNF, FOSL1                            | /                   |
| Human T-cell leukemia virus 1 infection              | ZFP36, EGR2, NFATC1, EGR1, FOS, TNF, FOSL1 | /                   |
| Human cytomegalovirus infection                      | NFATC1, PTGER4, TNF, FASLG                 | /                   |
| Hepatitis B                                          | EGR2, NFATC1, EGR3, FOS, TNF, FASLG        | /                   |
| Growth hormone synthesis, secretion and action       | JUNB, SOCS1, FOS                           | /                   |
| Graft-versus-host disease                            | TNF, FASLG                                 | /                   |
| Cytokine-cytokine receptor interaction               | IL27RA, CXCR3, TNF, TNFRSF12A, LTB, FASLG  | /                   |
| C-type lectin receptor signaling pathway             | EGR2, NFATC1, EGR3, TNF                    | /                   |
| Chagas disease                                       | FOS, TNF, FASLG, SERPINE1                  | /                   |
| B cell receptor signaling pathway                    | NFATC1, PTPN6, FOS                         | /                   |
| Axon regeneration                                    | DUSP2, DUSP5, DUSP6                        | /                   |
| Apoptosis                                            | FOS, TNF, FASLG, BCL2A1                    | /                   |
| Amphetamine addiction                                | FOS, ARC                                   |                     |
| AGE-RAGE signaling pathway in diabetic complications | NFATC1, EGR1, TNF, SERPINE1                | /                   |
